# Supplementary material for: Assembly-fission synthesized fluorescent sulfur quantum dots combined with tyrosinase catalytic oxidation for selective detection of p-aminophenol in water samples
Source: Royal Society of Chemistry journal article supplement (doi:10.1039/d3nj04152b), 2023-12-24
Supplement: d3nj04152b3.pdf [file d3nj04152b3.pdf]

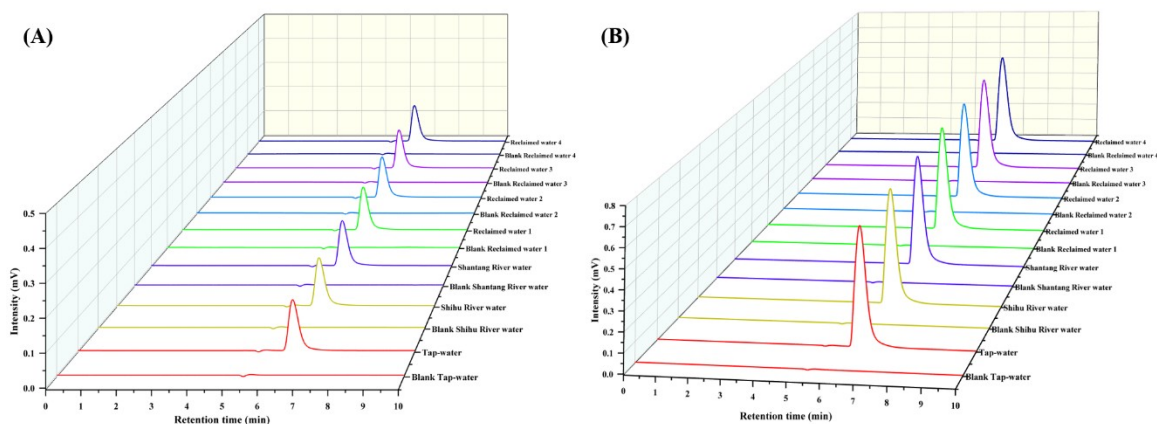

**Supplementary Figure** Typical chromatograms of *p*-AP in real samples with spiked

concentrations of 1  $\mu\text{M}$  (A) and 5  $\mu\text{M}$  (B)

**Supplementary Table** The detection of *p*-AP in real water samples by the HPLC method

| Sample                  | Blank | Spiked<br>( $\mu\text{M}$ ) | Found<br>( $\mu\text{M}$ ) | Recovery<br>(%) | RSD (%)<br>(n = 3) |
|-------------------------|-------|-----------------------------|----------------------------|-----------------|--------------------|
| Tap-water               | N.D.  | 1                           | 1.00                       | 100.1%          | 1.7                |
|                         |       | 5                           | 4.94                       | 98.8%           | 1.8                |
|                         |       | 30                          | Overloading                | -               | -                  |
| Shihu River<br>water    | N.D.  | 1                           | 0.99                       | 99.7%           | 2.1                |
|                         |       | 5                           | 4.95                       | 98.9%           | 2.1                |
|                         |       | 30                          | Overloading                | -               | -                  |
| Shantang<br>River water | N.D.  | 1                           | 0.98                       | 98.3%           | 1.5                |
|                         |       | 5                           | 4.88                       | 97.6%           | 1.7                |
|                         |       | 30                          | Overloading                | -               | -                  |
| Reclaimed<br>water 1 #  | N.D.  | 1                           | 0.99                       | 99.5%           | 2.3                |
|                         |       | 5                           | 4.82                       | 96.3%           | 2.1                |
|                         |       | 30                          | Overloading                | -               | -                  |
| Reclaimed<br>water 2 #  | N.D.  | 1                           | 0.99                       | 99.5%           | 2.2                |
|                         |       | 5                           | 4.70                       | 94.0%           | 1.8                |
|                         |       | 30                          | Overloading                | -               | -                  |
| Reclaimed<br>water 3 #  | N.D.  | 1                           | 0.97                       | 96.7%           | 2.5                |
|                         |       | 5                           | 4.71                       | 94.1%           | 2.2                |
|                         |       | 30                          | Overloading                | -               | -                  |
| Reclaimed<br>water 4 #  | N.D.  | 1                           | 0.98                       | 97.9%           | 2.3                |
|                         |       | 5                           | 4.75                       | 95.0%           | 2.2                |
|                         |       | 30                          | Overloading                | -               | -                  |

**Notes:** RSDs denote relative standard deviations.
