# Supplementary figures and images for: Assembly-fission synthesized fluorescent sulfur quantum dots combined with tyrosinase catalytic oxidation for selective detection of p-aminophenol in water samples
Source: Royal Society of Chemistry journal article supplement (doi:10.1039/d3nj04152b), 2023-12-24

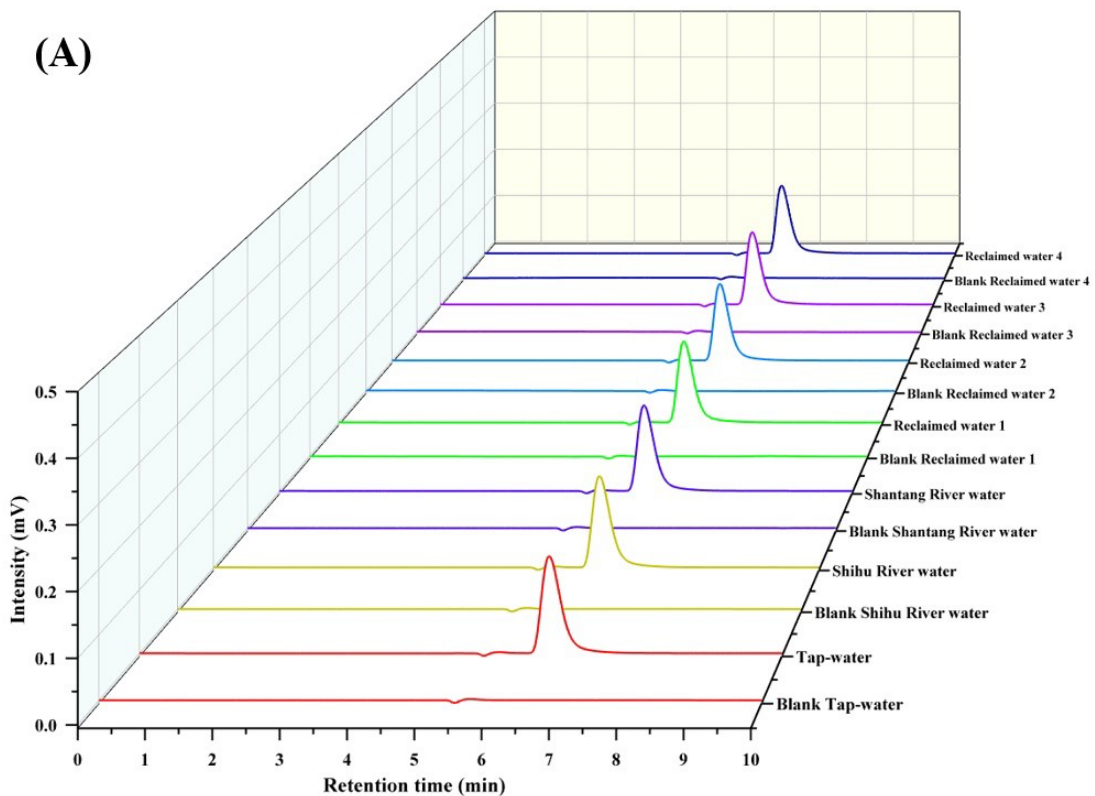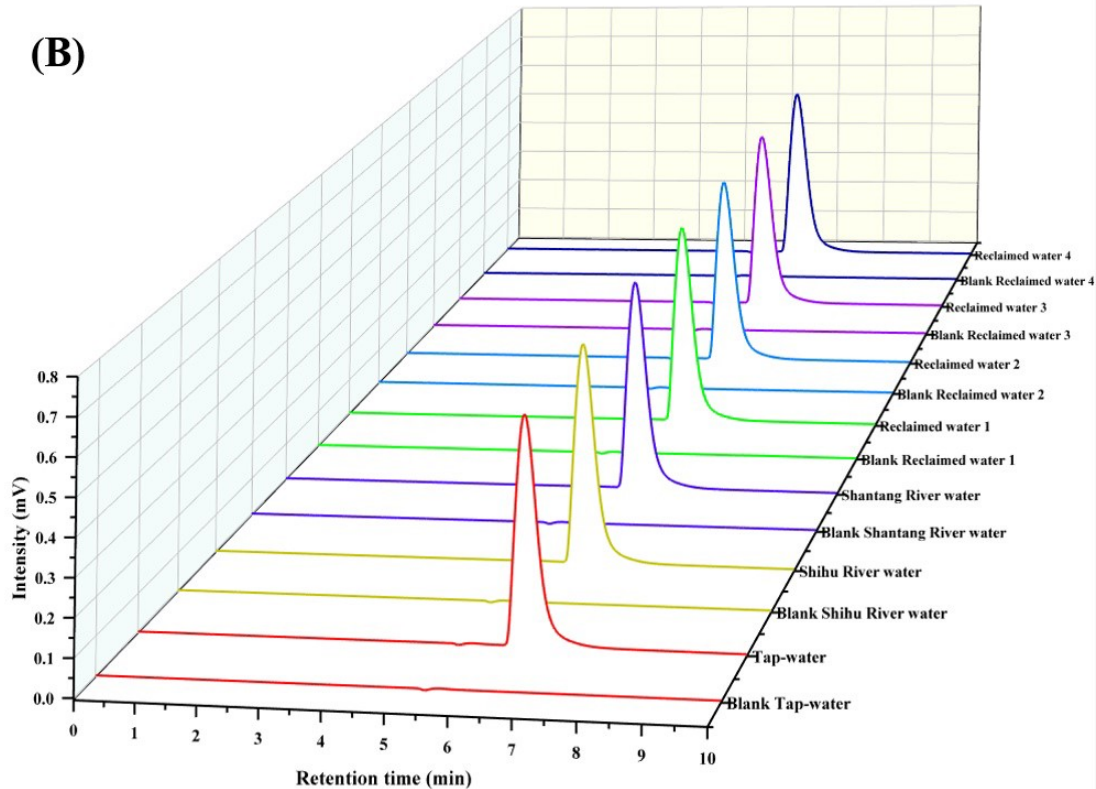

Supplement: d3nj04152b2.pdf [file d3nj04152b2.pdf]
